# Supplementary material for: In Vitro Protein Digestibility and Fatty Acid Profile of Commercial Plant-Based Milk Alternatives
Source: MDPI journal article supplement (doi:10.3390/foods9121784), 2020-12-01
Supplement: s1 [file s1]

## Supplementary Materials

**Table S1.** Composition of evaluated PBMA and cow's milk from packaging label and after CHNS analysis of protein content from freeze-dried samples.

| Samples <sup>1</sup>           | In 100 mL of the product     |                                   | Freeze-dried (dry matter) |                        |
|--------------------------------|------------------------------|-----------------------------------|---------------------------|------------------------|
|                                | Protein content <sup>2</sup> | % Dry matter content <sup>3</sup> | % Nitrogen <sup>4</sup>   | % Protein <sup>5</sup> |
| Almond-drink ( <i>Ecomil</i> ) | 1.0                          | 5.01                              | 2.75                      | 17.21                  |
| Hemp-drink ( <i>Ecomil</i> )   | 1.0                          | 4.35                              | 2.71                      | 16.94                  |
| Oat-drink ( <i>Oatly</i> )     | 1.0                          | 11.24                             | 1.90                      | 11.92                  |
| Soy-drink ( <i>Naturli</i> )   | 3.7                          | 6.96                              | 8.11                      | 50.73                  |
| Cow's milk ( <i>Arla</i> )     | 3.4                          | 12.25                             | 4.35                      | 27.81                  |

<sup>1</sup> Samples selected: PBMA with the highest protein content from all the different brands and the least of additives included.

<sup>2</sup> The list of ingredients and the protein content was obtained from the package label. Protein content was given as g/100 mL.

<sup>3</sup> The percentage of dry matter content (g/100 mL) was calculated after freeze-drying the samples.

<sup>4</sup> The % of nitrogen presented was obtained from CHNS analysis of  $\approx$  30 mg of freeze-dried sample.

<sup>5</sup> The % of the protein was calculated with the estimated conversion factor 6.25 from nitrogen content (%) (AOAC, 2000)
